# Supplementary material for: Do Coupons Expand or Cannibalize Revenue? Evidence from an e-Market
Source: Atypon-hosted journal article supplement (doi:10.1287/mnsc.2017.2934), 2018-04-03
Supplement: mnsc.2017.2934-sm-data.zip [file Readme_File_coupons.pdf › data/Readme_File_coupons.pdf]

## Readme File for “Do Coupons Expand or Cannibalize Revenue: Evidence from an E-market”

To replicate the main results in the paper, simply run the do file “coupons\_analysis.do.” This do file uses the file “ecoupons\_alcohol.dta” to create output that was used to create Tables 1 through 5 and Tables A3 and A4, as well as Figures 1 through 5.

A list of all variables and their definitions in the file “ecoupons\_alcohol.dta” is below. Data on coupon characteristics were obtained from Byers et al. (2012), who collected data on all deals through Groupon (January 3 to July 3, 2011) and LivingSocial (March 21 to July 3, 2011) for several major U.S. cities. We focus on restaurant deals in Dallas and Houston, Texas. Data on alcohol revenue were obtained through the website mybarsales.com, which reports monthly alcohol revenue of Texas restaurants and bars. Data on restaurant characteristics were collected through the restaurants’ respective Yelp pages, accessed April 2016.

Contains data from fin\data\ecoupons\_alcohol.dta

```
obs:      34,044
vars:      33                      17 Aug 2017 16:32
size:      3,370,356
```

| variable name | storage<br>type | display<br>format | value<br>label | variable label                          |
|---------------|-----------------|-------------------|----------------|-----------------------------------------|
| matchid       | str43           | %43s              |                | restaurant-city identifier              |
| city          | str7            | %9s               |                | city                                    |
| dataid        | str12           | %12s              |                | Groupon, LivingSocial, or control       |
| control       | byte            | %9.0g             |                | = 1 if in the control group             |
| ddate         | int             | %td               |                | Date of observation                     |
| alcrev        | float           | %9.0g             |                | restaurant alcohol revenue (month)      |
| num_sold      | int             | %8.0g             |                | Coupons sold                            |
| value         | byte            | %8.0g             |                | coupon value                            |
| groupon_price | byte            | %9.0g             |                | discounted (coupon) price               |
| you_save      | byte            | %8.0g             |                | = value - groupon_price                 |
| discount_pct  | byte            | %8.0g             |                | discount percentage                     |
| startingmonth | byte            | %9.0g             |                | month of offer                          |
| startingdate  | byte            | %9.0g             |                | day of offer                            |
| duration      | byte            | %8.0g             |                | Length of offer on site                 |
| expiremonth   | byte            | %9.0g             |                | month of coupon expiration              |
| expiredate    | byte            | %9.0g             |                | day of coupon expiration                |
| foodtype      | byte            | %8.0g             | foodtype       | food type                               |
| recent        | byte            | %9.0g             |                | = 1 if the restaurant opened after 2006 |
| rfancy        | byte            | %9.0g             |                | number of dollar signs on Yelp          |
| reviews       | int             | %10.0g            |                | number of reviews on Yelp               |
| sopen         | byte            | %9.0g             |                | = 1 if still open in 2016 (Yelp)        |
| dinner        | byte            | %9.0g             |                | = 1 if good for dinner (Yelp)           |
| latenight     | byte            | %9.0g             |                | = 1 if has a late night menu (Yelp)     |
| take_out      | byte            | %10.0g            |                | = 1 if offers take-out (Yelp)           |
| delivers      | byte            | %9.0g             |                | = 1 if delivers (Yelp)                  |
| reservations  | byte            | %10.0g            |                | = 1 if takes reservations (Yelp)        |
| credit_cards  | byte            | %10.0g            |                | = 1 if accepts credit_cards (Yelp)      |
| info          | byte            | %9.0g             |                | = 1 if consumption info available       |
| before        | byte            | %9.0g             |                | 1 if no coupon offer yet                |
| during        | byte            | %9.0g             |                | 1 if coupons are currently valid        |
| after         | byte            | %9.0g             |                | 1 if coupons have expired               |
| year          | int             | %9.0g             |                | year of observation                     |
| month         | byte            | %9.0g             |                | month of observation                    |

A second do file, “survey\_\_analysis.do,” uses the survey results from the file “survey\_results.dta” to create the summary statistics of reported alcohol and food expenditure in Tables A1 and A2. A list of the variables from the file is below:

Contains data from fin\data\survey\_results.dta

```
obs:          73
vars:         10                               17 Aug 2017 15:57
size:         4,307
```

| variable name    | storage<br>type | display<br>format | value<br>label | variable label                          |
|------------------|-----------------|-------------------|----------------|-----------------------------------------|
| restaurant_id    | float           | %9.0g             |                | restaurant identifier                   |
| foodtp           | str8            | %9s               |                | food type                               |
| offerdate        | str9            | %9s               |                | date of Groupon offer                   |
| food_spend       | str5            | %9s               |                | spending on food (regular consumers)    |
| g_food_spend     | str5            | %9s               |                | spending on food (Groupon users)        |
| food_diff        | str4            | %9s               |                | difference (food spending)              |
| alcohol_spend    | str5            | %9s               |                | spending on alcohol (regular consumers) |
| g_alcohol_spend  | str5            | %9s               |                | spending on alcohol (Groupon users)     |
| alcohol_diff     | str4            | %9s               |                | difference (alcohol spending)           |
| alc_price_change | str10           | %10s              |                | Did alcohol prices change?              |

Note that we blinded the restaurants in this file as promised in the survey.
